# Supplementary material for: A core@dual-shell nanorod array with a cascading band configuration for enhanced photocatalytic properties and anti-photocorrosion
Source: Royal Society of Chemistry journal article supplement (doi:10.1039/c9ta13028d), 2020-01-01
Supplement: c9ta13028d1.pdf [file c9ta13028d1.pdf]

## Supporting Information

### **Core@Dual-shell Nanorod Array with Cascading Band Configuration for Enhanced Photocatalytic Properties and Anti-photocorrosion**

Daotong You<sup>1</sup>, Chunxiang Xu<sup>1\*</sup>, Xiangxiang Wang<sup>1</sup>, Jing Wang<sup>2</sup>, Wenyue Su<sup>2</sup>, Ru Wang<sup>1</sup>, Tianlang Chen<sup>1</sup>, Ru Wang<sup>1</sup>, and Zengliang Shi<sup>1</sup>

*1. State Key Laboratory of Bioelectronics, School of Biological Sciences & Medical Engineering, Southeast University, Nanjing, 210096, P. R. China*

*2. State Key Laboratory of Photocatalysis on Energy and Environment, Fuzhou University, Fuzhou, 350002, P. R. China*

\* Corresponding Author: e-mail address: [xcxseu@seu.edu.cn](mailto:xcxseu@seu.edu.cn)

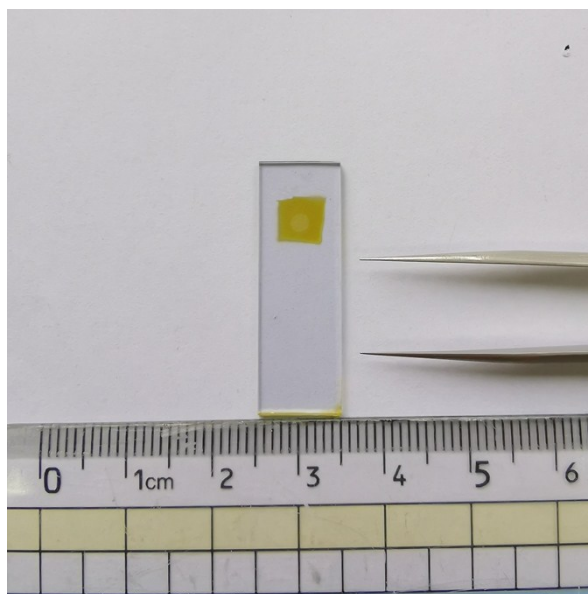

**Fig. S1.** The picture of the working photoelectrode.

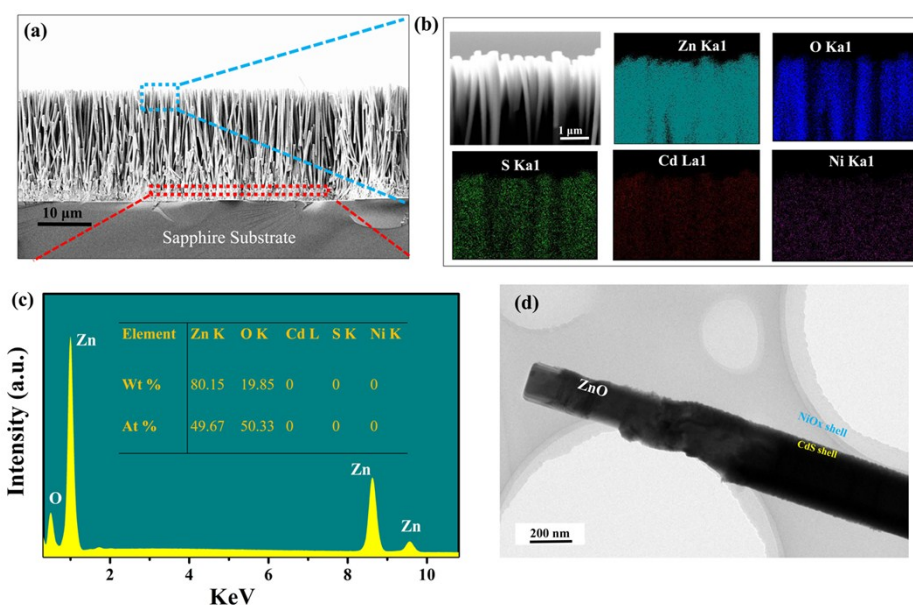

**Fig. S2.** (a) SEM image of the cross-section of the ZnO-CdS-NiO<sub>x</sub> nanorod array, (b) EDS element maps of Zn, O, S, Cd and Ni collected from the top-middle part (light blue box region), and (c) EDS spectrum from the bottom of the nanorod array (red box region). (d) TEM images of an individual ZnO-CdS-NiO<sub>x</sub> nanorod.

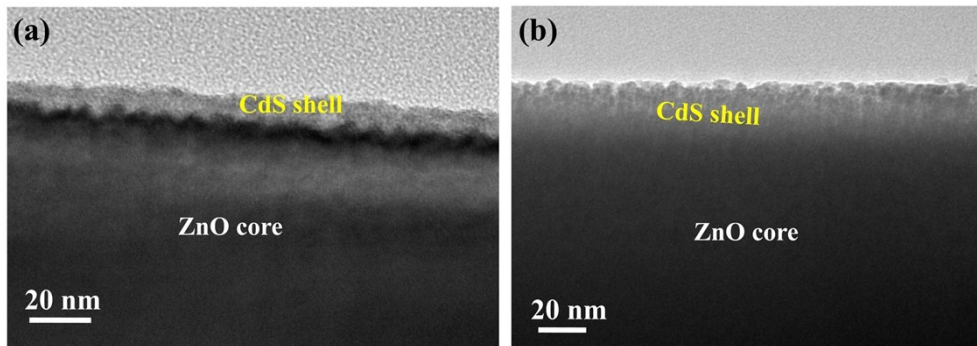

**Fig. S3.** TEM images of (a) ZnO-CdS-1 (sputtering for 8 min) core-shell nanorod and (b) ZnO-CdS-3 (sputtering for 15 min) core-shell nanorod.

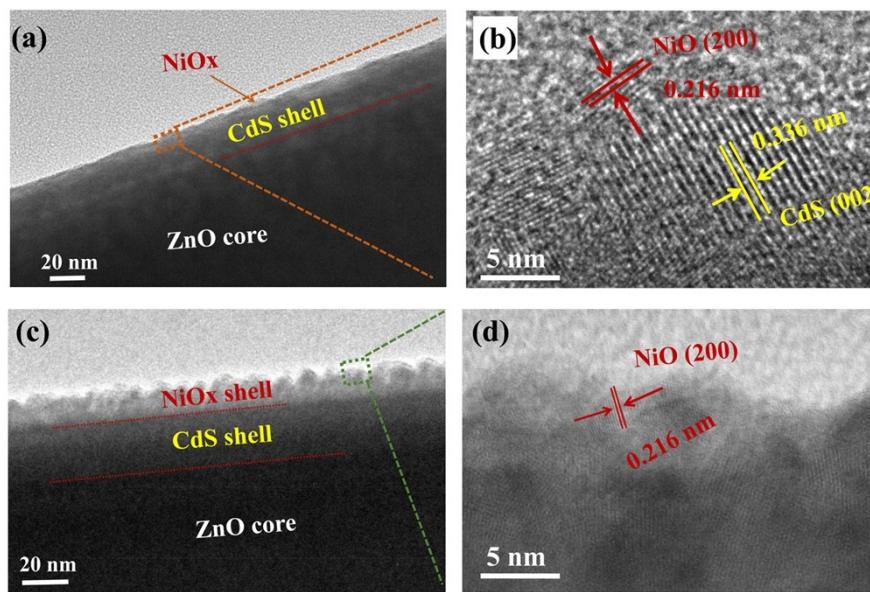

**Fig. S4.** TEM images and corresponding HRTEM images of (a), (b) ZnO-CdS-NiO<sub>x</sub>-1 (sputtering for 3 min) core@shell nanorod and (c), (d) ZnO-CdS-NiO<sub>x</sub>-3 (sputtering for 8 min) core@shell nanorod.

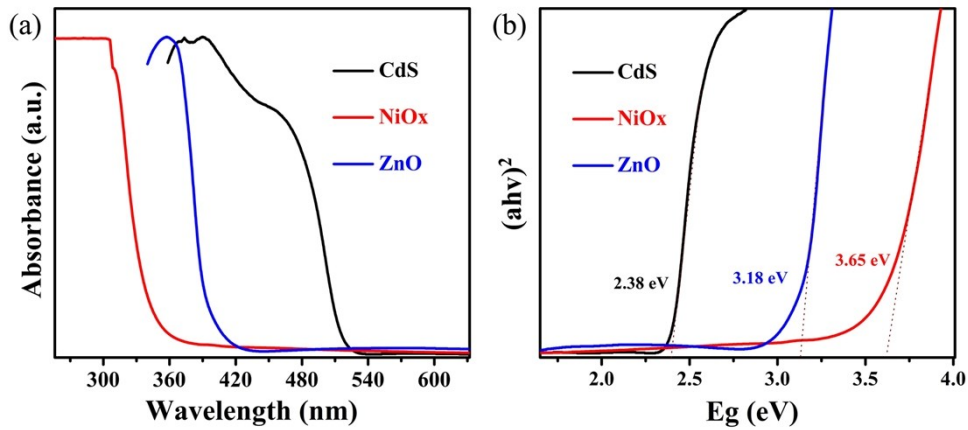

**Fig. S5.** (a) UV-Vis diffuse reflectance spectra of CdS, ZnO and NiO<sub>x</sub>. (b) Tauc plots of CdS, ZnO and NiO<sub>x</sub>.

The band gap energy ( $E_g$ ) for the samples were determined through following formula:  $(\alpha h\nu)^{1/n} = A(h\nu - E_g)$ , where  $A$ ,  $E_g$ ,  $h$ ,  $\alpha$  and  $\nu$  are proportionality constant, band gap, Planck constant, absorption coefficient and light frequency, respectively. The  $n$  value is determined by the type of optical transition of semiconductors (the  $n$  values of direct-gap semiconductor and indirect-gap semiconductor are 1 and 4).[1,2] The corresponding of  $E_g$  values of CdS, ZnO and NiO<sub>x</sub> were estimated to be 2.38 eV, 3.18 eV and 3.65 eV, respectively.

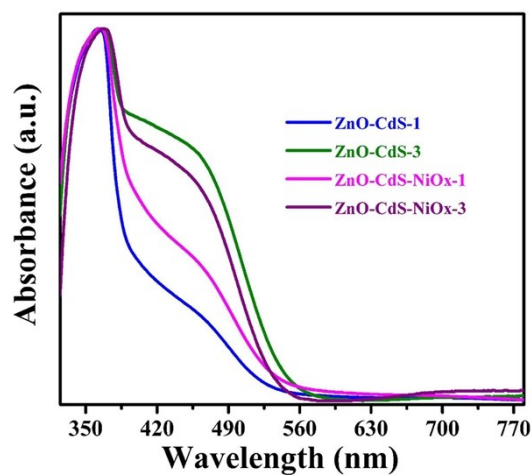

**Fig. S6.** The optical absorption spectra of samples.

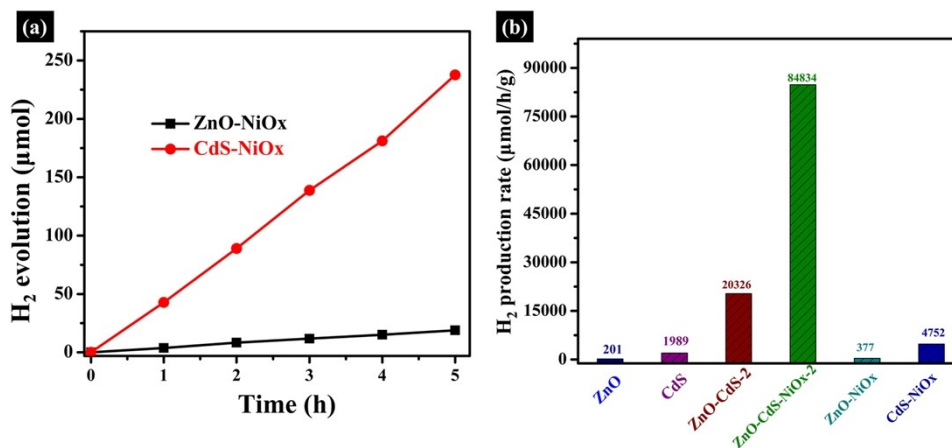

**Fig. S7.** (a) Time courses of ZnO-NiO<sub>x</sub> and CdS-NiO<sub>x</sub> H<sub>2</sub> evolution, and (b) the compared H<sub>2</sub> evolution rates of ZnO, CdS, ZnO-CdS-2, ZnO-CdS-NiO<sub>x</sub>-2, ZnO-NiO<sub>x</sub> and CdS-NiO<sub>x</sub> under simulated sunlight irradiation.

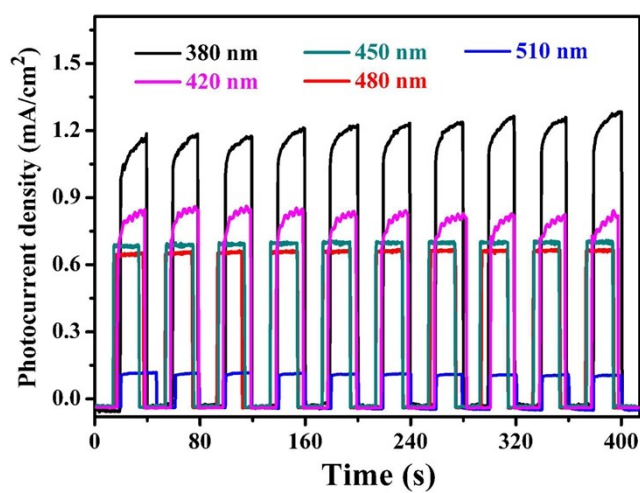

**Fig. S8.** Photocurrent responses of ZnO-CdS-NiO<sub>x</sub>-2 measured at  $\lambda = 380, 420, 450, 480$  and  $510$  nm, respectively.

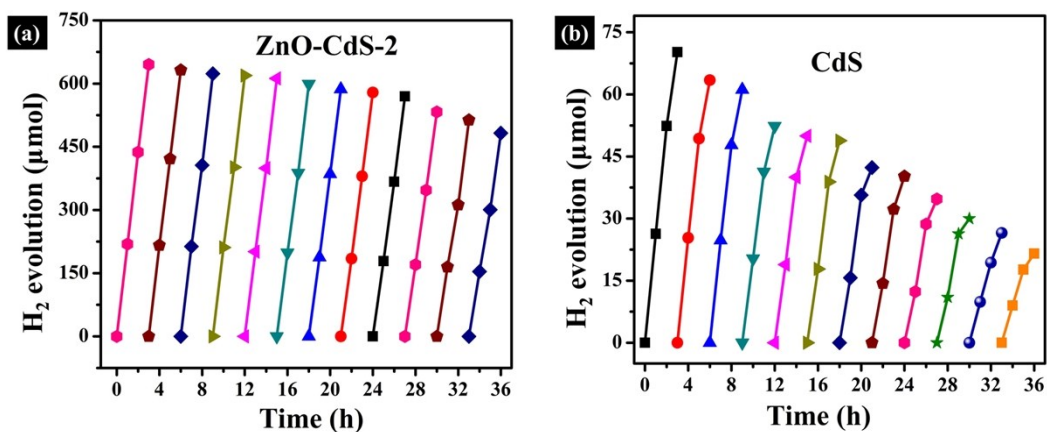

**Fig. S9.** Cycling runs for the photocatalytic hydrogen evolution activity under simulated sunlight of (a) ZnO-CdS-2 and (b) CdS.

**Table S1.** Comparison with previous ZnO-CdS heterostructure photocatalysts on H<sub>2</sub> evolution activity.

| Photocatalyst                                    | Light source                          | Sacrificing agent                                 | Activity [mmol/h g] | Stability | AQE (%) | Photocurrent (mA/cm <sup>2</sup> ) | Ref       |
|--------------------------------------------------|---------------------------------------|---------------------------------------------------|---------------------|-----------|---------|------------------------------------|-----------|
| ZnO-CdS-NiO <sub>x</sub> core@dual-shell nanorod | 300W Xe lamp                          | Na <sub>2</sub> S/Na <sub>2</sub> SO <sub>3</sub> | 84.83               | 36 h      | 33.89   | 8.44@0.1 V                         | This work |
| CdS/ZnO nanofibers                               | 500W Xe lamp ( $\lambda \geq 420$ nm) | Na <sub>2</sub> S/Na <sub>2</sub> SO <sub>3</sub> | 0.35                | 24 h      | -       | -                                  | 3         |
| ZnO/CdS microspheres                             | 350W Xe lamp                          | Na <sub>2</sub> S/Na <sub>2</sub> SO <sub>3</sub> | 4.13                | 12 h      | -       | 0.06                               | 4         |
| CdSQDs/ZnO nanosheets                            | 300W Xe lamp ( $\lambda \geq 420$ nm) | Na <sub>2</sub> S/Na <sub>2</sub> SO <sub>3</sub> | 22.12               | 25 h      | -       | 0.5@0.5 V                          | 5         |
| NiO@Ni-ZnO/RGO/CdS                               | 300W Xe lamp                          | Na <sub>2</sub> S/Na <sub>2</sub> SO <sub>3</sub> | 8.2                 | 15 h      | -       | -                                  | 6         |
| Pt/CdS/ZnO                                       | 300W Xe lamp                          | Na <sub>2</sub> S/Na <sub>2</sub> SO <sub>3</sub> | 4.41                | -         | -       | -                                  | 7         |
| CdS@ZnO                                          | 225W Xe lamp                          | Na <sub>2</sub> S/Na <sub>2</sub> SO <sub>3</sub> | 11.13               | 20 h      | 7.18    | 0.6@0.5 V                          | 8         |
| CdS-ZnO nanowires                                | 300W Xe lamp                          | ascorbic Acid                                     | 9.61                | -         | -       | -                                  | 9         |
| CdS/ZnO                                          | 500W Xe lamp                          | Na <sub>2</sub> S/Na <sub>2</sub> SO <sub>3</sub> | 0.85                | 15 h      | -       | -                                  | 10        |
| ZnO/NiO/Cd <sub>1-x</sub> Zn <sub>x</sub> S      | 450W Xe lamp                          | Na <sub>2</sub> S/Na <sub>2</sub> SO <sub>3</sub> | 17                  | 12 h      | 15      | -                                  | 11        |
| NiO-ZnO-CdS                                      | 150W Xe lamp                          | Na <sub>2</sub> S/Na <sub>2</sub> SO <sub>3</sub> | -                   | -         | -       | 2.15@1.23V                         | 12        |
| NiO/CdS@ZnO                                      | 300W Xe lamp                          | Na <sub>2</sub> S/Na <sub>2</sub> SO <sub>3</sub> | -                   | -         | -       | 0.96@-0.6 V                        | 13        |

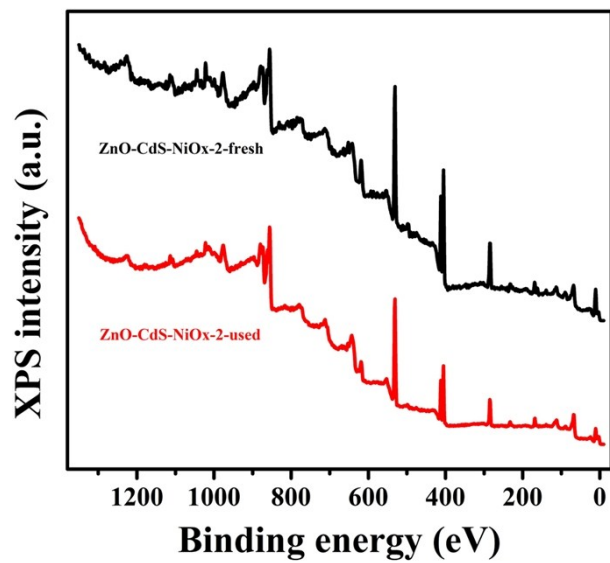

**Fig. S10.** XPS survey spectra of ZnO-CdS-NiO<sub>x</sub>-2 before and after 12 cyclic usages.

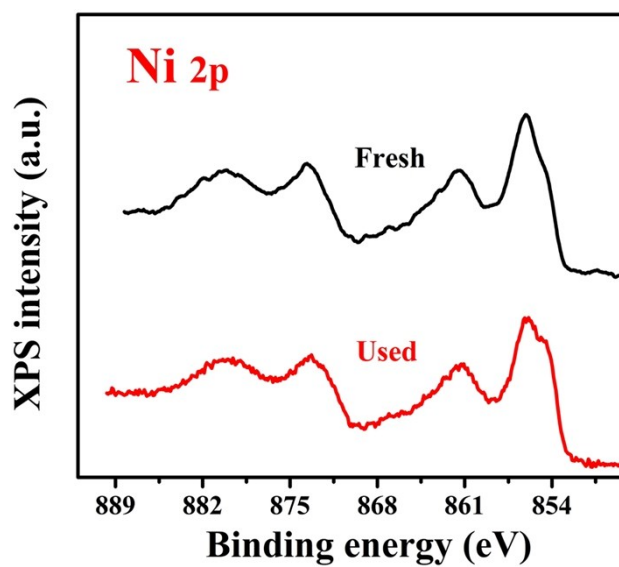

**Fig. S11.** High-resolution Ni 2p XPS spectra of ZnO-CdS-NiO<sub>x</sub>-2 before and after 12 cyclic usages.

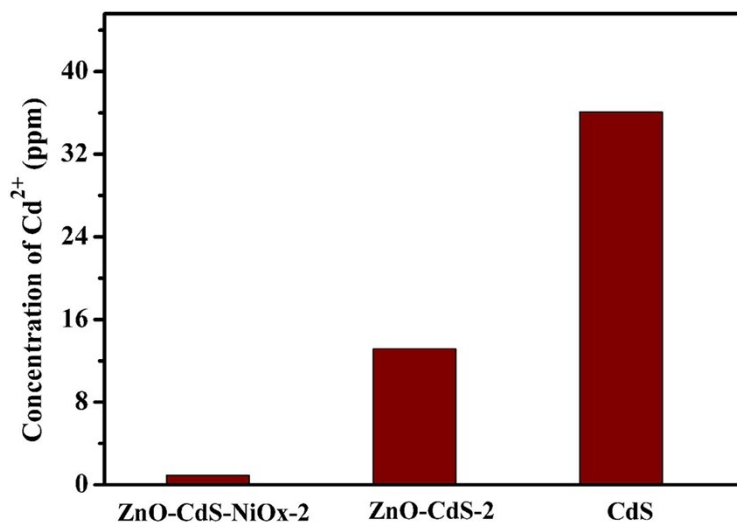

**Fig. S12.** The concentration of Cd<sup>2+</sup> of CdS, ZnO-CdS-2 and ZnO-CdS-NiO<sub>x</sub>-2 after 12 cyclic usages.

**Table S2.** The average fluorescence lifetimes of ZnO, ZnO-CdS-2 and ZnO-CdS-NiO<sub>x</sub>-2, respectively.

| Sample                      | Lifetime, $\tau$ (ps) | Pre-exponential factors B (%) | Average lifetime $\tau$ (ps) |
|-----------------------------|-----------------------|-------------------------------|------------------------------|
| ZnO                         | $\tau_1 = 257.55$     | $B_1 = 52$                    | 257.55                       |
|                             | $\tau_2 = 257.55$     | $B_2 = 48$                    |                              |
| ZnO-CdS-2                   | $\tau_1 = 378.72$     | $B_1 = 63.25$                 | 450.98                       |
|                             | $\tau_2 = 575.34$     | $B_2 = 36.75$                 |                              |
| ZnO-CdS-NiO <sub>x</sub> -2 | $\tau_1 = 492.23$     | $B_1 = 71.38$                 | 549.23                       |
|                             | $\tau_2 = 691.41$     | $B_2 = 28.62$                 |                              |

The biexponential function:  $I(t) = B_1 \exp(-t/\tau_1) + B_2 \exp(-t/\tau_2)$  [14]



## References

1. Y. Wang, G. Tan, T. Liu, Y. Su, H. Ren, X. Zhang, Y. Liu, *Appl. Catal. B-Environ.*, 2018, **234**, 37-49
2. G. Ba, Z. Liang, H. Li, N. Du, J. Liu, W. Hou, *Appl. Catal. B-Environ.*, 2019, **253**, 359–368
3. G. Yang, W. Yan, Q. Zhang, S. Shen, S. Ding, *Nanoscale*, 2013, **5**, 12432-12439.
4. S. Wang, B. Zhu, M. Liu, L. Zhang, J. Yu, M. Zhou, *Appl. Catal. B-Environ.*, 2019, **243**, 19-26.
5. D. Ma, J. Shi, Y. Zou, Z. Fan, X. Ji, C. Niu, *ACS Appl. Mater. Inter.*, 2017, **9**, 25377-25386.
6. F. Chen, L. Zhang, X. Wang, R. Zhang, *Appl. Surf. Sci.*, 2017, **422**, 962-969.
7. Y. G. Kim, W. K. Jo, *Inte. J. Hydrogen Energ.*, 2017, **42**, 11356-11363.
8. D. Ma, J. W. Shi, Y. Zou, Z. Fan, X. Ji, C. Niu, L. Wang, *Nano Energy*, 2017, **39**, 183-191.
9. S. Tso, W. S. Li, B. H. Wu, L. J. Chen, *Nano Energy*, 2018, **43**, 270-277.
10. X. Zou, P. P. Wang, C. Li, J. Zhao, D. Wang, T. Asefa, G. D. Li, *J. Mater. Chem. A*, 2014, **2**, 4682-4689
11. S. R. Lingampalli, A. Roy, M. Ikram, C. N. R. Rao, *Chem. Phys. Lett.*, 2014, **610**, 316–320
12. P. Iyengar, C. Das, K. R. Balasubramaniam, *J. Phys. D: Appl. Phys.*, 2017, **50**, 10LT01
13. Y. Li, X. Zhang, S. Jiang, H. Dai, X. Sun, Y. Li, *Sol. Energ. Mat. Sol. C.*, 2015, **132**, 40–46
14. D. Ruan, S. Kim, M. Fujitsuka, T. Majima, *Appl. Catal. B-Environ.*, 2018, **238**, 638–646
